# Supplementary material
Source: ML conference proceedings conference paper supplement (https://openreview.net/forum?id=2T5SpHS9QQ)
Supplement: supplementary_material [file hyper_data.xlsx]

## Sheet: gamma
value	0.004	0.004	0.004	0.004	0.004	0.0045	0.0045	0.0045	0.0045	0.0045	0.005	0.005	0.005	0.005	0.005	0.0055	0.0055	0.0055	0.0055	0.0055	0.006	0.006	0.006	0.006	0.006	0.0065	0.0065	0.0065	0.0065	0.0065	0.007	0.007	0.007	0.007	0.007
F1 score	0.753988	0.742826	0.759751	0.76714	0.757174	0.748149	0.744385	0.722686	0.719834	0.748149	0.724799	0.730327	0.699587	0.739735	0.722686	0.699062	0.73632	0.731557	0.709787	0.7	0.717	0.72695	0.7	0.731557	0.72695	0.66073	0.688456	0.672387	0.672214	0.7	0.649224	0.672387	0.672926	0.649224	0.672387
SHD	31	33	30	30	31	32	32	34	34	32	34	32	36	32	34	35	32	31	34	35	32	31	35	31	31	37	35	34	34	35	37	35	34	36	34
precision	0.7	0.681	0.71	0.699	0.694	0.69	0.696	0.671	0.692	0.69	0.687	0.697	0.683	0.701	0.671	0.682	0.708	0.714	0.688	0.7	0.717	0.721	0.7	0.714	0.721	0.691	0.694	0.717	0.696	0.7	0.685	0.717	0.74	0.685	0.717
recall	0.817	0.817	0.817	0.85	0.833	0.817	0.8	0.783	0.75	0.817	0.767	0.767	0.717	0.783	0.783	0.717	0.767	0.75	0.733	0.7	0.717	0.733	0.7	0.75	0.733	0.633	0.683	0.633	0.65	0.7	0.617	0.633	0.617	0.617	0.633

## Sheet: KQ
K	Q1	Q2	Q3	Q4	Q5
K2	32/0.717/0.717	39/0.667/0.633	46/0.553/0.6	43/0.531/0.567	48/0.516/0.55
K3	34/0.719/0.683	36/0.679/0.633	39/0.623/0.633	50/0.5/0.6	46/0.538/0.717
K4	35/0.7/0.7	41/0.610/0.6	46/0.517/0.517	49/0.515/0.567	50/0.5/0.617
K5	32/0.717/0.717	44/0.593/0.583	40/0.596/0.567	48/0.516/0.533	47/0.529/0.55
