# Supplementary material
Source: ML conference proceedings conference paper supplement (https://openreview.net/forum?id=2T5SpHS9QQ)
Supplement: supplementary_material [file splitNN_data.xlsx]

## Sheet: Sheet1
	Split Position A	Split Position B	Split Position C	Split Position D
inter edge f1	0.66	0.58	0.6	0.55
intra edge f1	0.7	0.68	0.72	0.72
